# Supplementary material for: Triglyceride-glucose index predicts death in patients with stroke younger than 65
Source: PubMed Central journal article supplement (PMC10435085; doi:10.3389/fneur.2023.1198487), 2023-08-03
Supplement: Data_Sheet_1.pdf [file Data_Sheet_1.pdf]

## *Supplementary Material*

# Triglyceride-Glucose Index Predicts 3-Month Death after Acute Ischemic Stroke in Patients of Different Ages

Ruishan Liu<sup>1†</sup>, Lijuan Li<sup>2,3†</sup>, Lu Wang<sup>2,3\*</sup>, Shihong Zhang<sup>1\*</sup>

\* **Correspondence:** Shihong Zhang: zsh9@hotmail.com; Lu Wang: wanglu0823@scu.edu.cn

### Supplementary Table

**Supplementary Table 1. Logistic regression subgroup analysis for the association between TGI as a categorical variable and 3-month death**

| Complications          | OR (95%CI), P-value |                             |                             | P for interaction |
|------------------------|---------------------|-----------------------------|-----------------------------|-------------------|
|                        | T1                  | T2                          | T3                          |                   |
| <b>Age</b>             |                     |                             |                             | <b>0.021</b>      |
| Younger patients       | 1                   | 2.65 (1.04, 6.72),<br>0.041 | 2.96 (1.16, 7.58),<br>0.024 |                   |
| Older patients         | 1                   | 0.94 (0.59, 1.50),<br>0.805 | 1.7 (0.79, 2.03),<br>0.323  |                   |
| <b>Stroke severity</b> |                     |                             |                             | <b>0.715</b>      |
| Mild                   | 1                   | 1.00 (0.57, 1.76),<br>0.990 | 1.42 (0.82, 2.46),<br>0.211 |                   |
| Severe                 | 1                   | 1.36 (0.74, 2.50),<br>0.317 | 1.45 (0.78, 2.73),<br>0.242 |                   |
| <b>Sex</b>             |                     |                             |                             | <b>0.099</b>      |
| Male                   | 1                   | 0.79 (0.43,1.45),<br>0.446  | 1.84(1.05, 3.22),<br>0.033  |                   |

|                                |   |                            |                            |       |
|--------------------------------|---|----------------------------|----------------------------|-------|
| Female                         | 1 | 1.30(0.73, 2.34),<br>0.373 | 1.75(0.97, 3.15),<br>0.064 |       |
| <b>Atrial fibrillation</b>     |   |                            |                            | 0.783 |
| Yes                            | 1 | 1.26 (0.55,2.90),<br>0.584 | 2.10 (0.90,4.88),<br>0.084 |       |
| No                             | 1 | 1.23(0.77, 1.98),<br>0.389 | 1.39(0.86, 2.25),<br>0.177 |       |
| <b>Rheumatic heart disease</b> |   |                            |                            | 0.817 |
| Yes                            | 1 | 1.38(0.43,4.47), 0.590     | 1.21(0.29,5.12),<br>0.797  |       |
| No                             | 1 | 1.14(0.74,1.76), 0.559     | 1.51(0.98,2.33),<br>0.060  |       |
| <b>Coronary heart disease</b>  |   |                            |                            | 0.899 |
| Yes                            | 1 | 2.62(0.55,12.44),<br>0.224 | 3.37(0.70,16.13),<br>0.129 |       |
| No                             | 1 | 1.16(0.76,1.78), 0.487     | 1.40(0.91,2.16),<br>0.131  |       |
| <b>Diabetes</b>                |   |                            |                            | 0.559 |
| Yes                            | 1 | 1.21(0.40,3.62), 0.733     | 0.97(0.33,2.81),<br>0.954  |       |
| No                             | 1 | 1.08(0.69,1.69), 0.731     | 1.55(0.96,2.50),<br>0.071  |       |
| <b>Hypertension</b>            |   |                            |                            | 0.610 |
| Yes                            | 1 | 1.17(0.68,2.02), 0.573     | 1.36(0.79,2.33),<br>0.272  |       |

|                               |   |                               |                                       |       |
|-------------------------------|---|-------------------------------|---------------------------------------|-------|
| No                            | 1 | 1.17(0.63,2.18), 0.624        | 1.78(0.92,3.45),<br>0.089             |       |
| <b>Cardioembolic stroke</b>   |   |                               |                                       | 0.384 |
| Yes                           | 1 | 1.36(0.14,13.21),<br>0.791    | 4.67(0.51,42.57),<br>0.171            |       |
| No                            | 1 | 1.11(0.74,1.68), 0.616        | 1.35(0.87,2.09),<br>0.181             |       |
| <b>Lipid lowering therapy</b> |   |                               |                                       | 0.317 |
| Yes                           | 1 | 0.94(0.56,1.58), 0.818        | 1.47(0.90,2.39),<br>0.126             |       |
| No                            | 1 | 1.65(0.82,3.34), 0.159        | 1.74(0.81,3.75),<br>0.154             |       |
| <b>Antidiabetic drugs</b>     |   |                               |                                       | 0.593 |
| Yes                           | 1 | 1.13(0.46,2.76), 0.796        | 1.09(0.46, 2.62),<br>0.839            |       |
| No                            | 1 | 1.14(0.72,1.81), 0.570        | 1.73(1.07, 2.80),<br>0.025            |       |
| <b>Cancer</b>                 |   |                               |                                       | 0.387 |
| Yes                           | 1 | 14.35 (0.61, 339.06)<br>0.099 | 151.79(1.93,<br>11949.1) <b>0.024</b> |       |
| No                            | 1 | 1.19 (0.78, 1.80)<br>0.425    | 1.24 (0.90, 1.91)<br>0.344            |       |

---

Adjusted for age, sex, baseline NIHSS, the time from stroke onset to admission, atrial fibrillation, rheumatic heart disease, coronary heart disease, drinking, smoking, TOAST, hemoglobin, creatinine, HDL, antiplatelet therapy.

## Supplementary Figures

**Supplementary Figure 1. Cubic spline curve for the association between TGI levels and adjusted odds ratio for 3-month death in all patients (Supplementary Figure 1A), young patients (Supplementary Figure 1B), and old patients (Supplementary Figure 1C).**

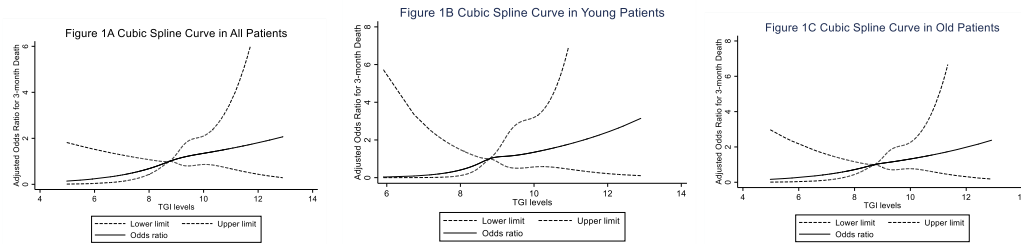

Logistic regression analyses with adjustment for age, sex, baseline NIHSS, the time from stroke onset to admission, atrial fibrillation, rheumatic heart disease, coronary heart disease, drinking, smoking, TOAST, hemoglobin, creatinine, HDL, antiplatelet therapy.

**Supplementary Figure 2. Cubic spline curve for the association between TGI levels and adjusted odds ratio for 12-month death in all patients (Supplementary Figure 2A), young patients (Supplementary Figure 2B), and old patients (Supplementary Figure 2C).**

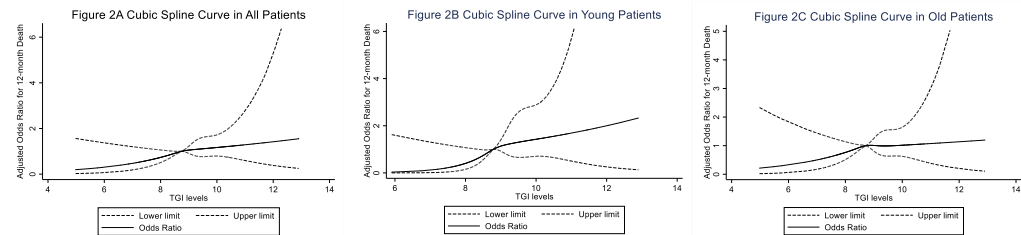

Logistic regression analyses with adjustment for age, sex, baseline NIHSS, the time from stroke onset to admission, atrial fibrillation, rheumatic heart disease, coronary heart disease, drinking, smoking, TOAST, hemoglobin, creatinine, HDL, antiplatelet therapy.
